# Supplementary material for: A photochromic Cd(ii)-organic framework showing highly efficient dual-response sensing properties
Source: Royal Society of Chemistry journal article supplement (doi:10.1039/d3nj04122k), 2023-01-01
Supplement: d3nj04122k1.pdf [file d3nj04122k1.pdf]

## Supporting Information

### **A photochromic Cd(II)-organic framework showing highly efficient dual-response sensing properties**

Jinfang Zhang<sup>a,\*</sup>, Zhuo Lin<sup>a</sup>, Yinlong Yue<sup>a</sup>, Qinghan Chen<sup>a</sup>, Dejing Yin<sup>b</sup>, Chi Zhang<sup>a,c,\*</sup>

<sup>a</sup> *International Joint Research Center for Photoresponsive Molecules and Materials, School of Chemical and Material Engineering, Jiangnan University, Wuxi 214122, P. R. China*

<sup>b</sup> *School of Biotechnology, Jiangnan University, Wuxi 214122, P. R. China*

<sup>c</sup> *School of Chemical Science and Engineering, Tongji University, Shanghai 200092, P. R. China*

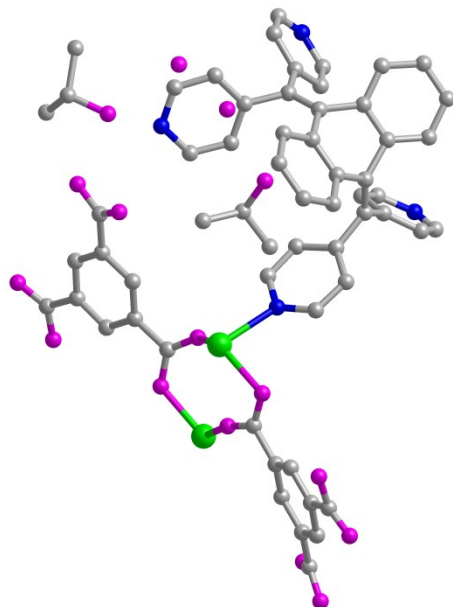

**Figure S1.** The asymmetric unit of **1** (Cd, green; N, blue; O pink; C, grey; all H atoms are omitted for clarity).

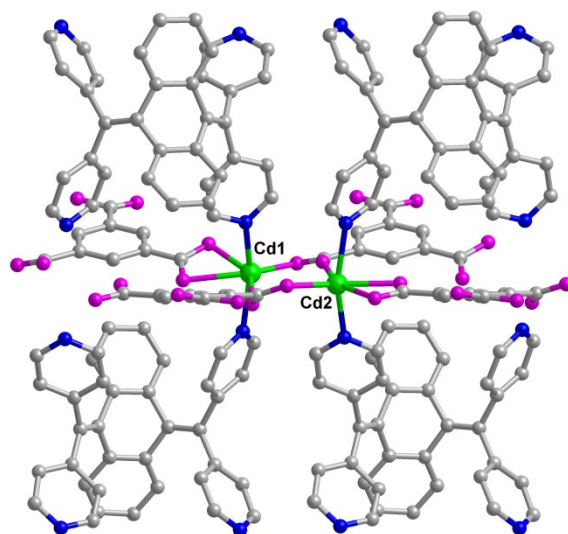

**Figure S2.** The coordination environment of Cd(II) in **1** (all H atoms are omitted for clarity).

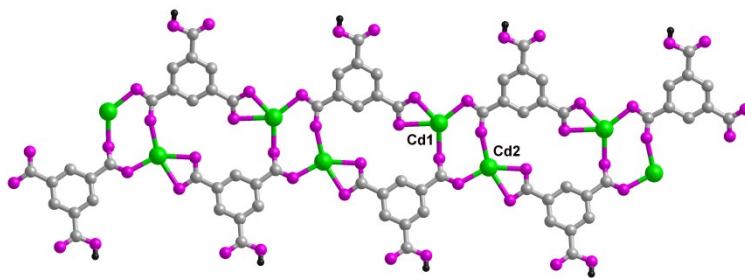

**Figure S3.** 1-D chain fabricated by  $[\text{Cd}_2(\text{COO})]^{2+}$  clusters and HBTC double-bridges (Cd, green; O pink; C, grey H, black).

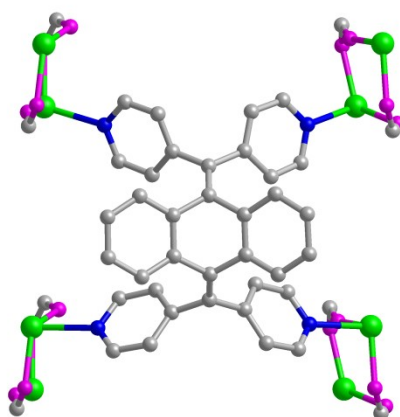

**Figure S4.** The coordination and connected environment of L unit in **1** (Cd, green; N, blue; O pink; C, grey; all H atoms are omitted for clarity).

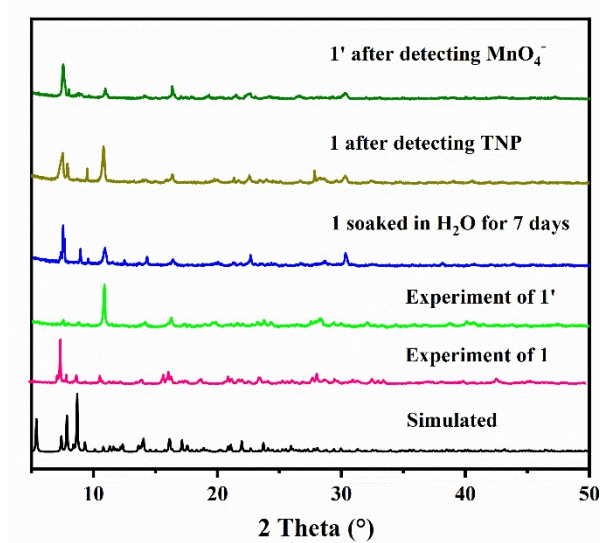

**Figure S5.** PXRD patterns of **1** and **1'**.

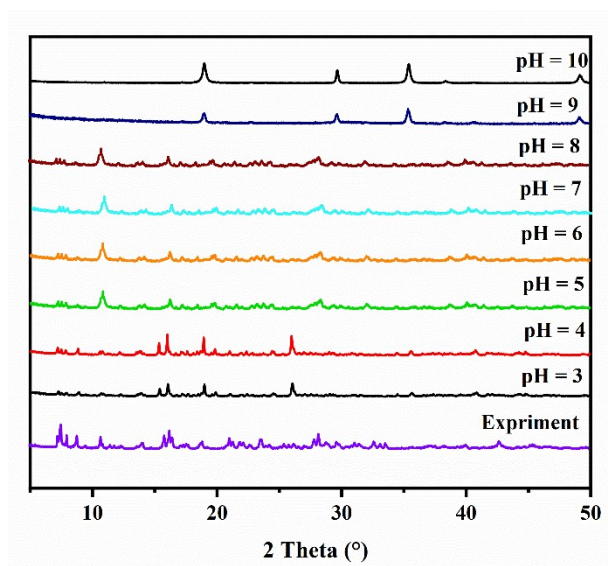

**Figure S6.** PXRD patterns of **1** in water with different pH values.

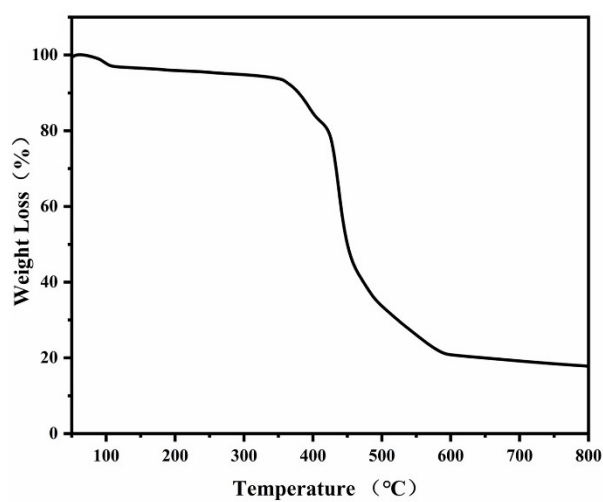

**Figure S7.** TGA curve of **1**

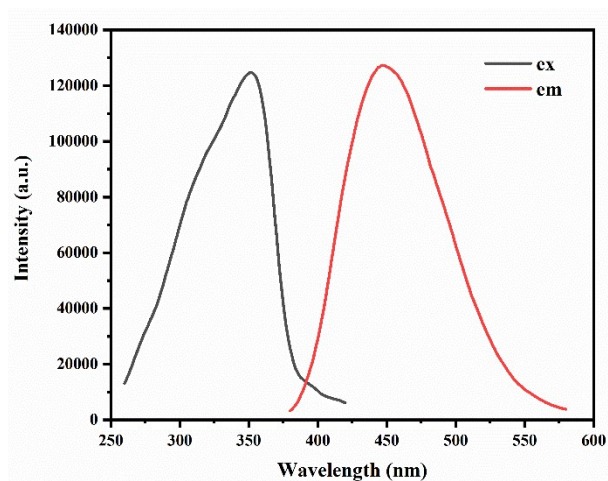

**Figure S8.** Excitation and emission of **1**.

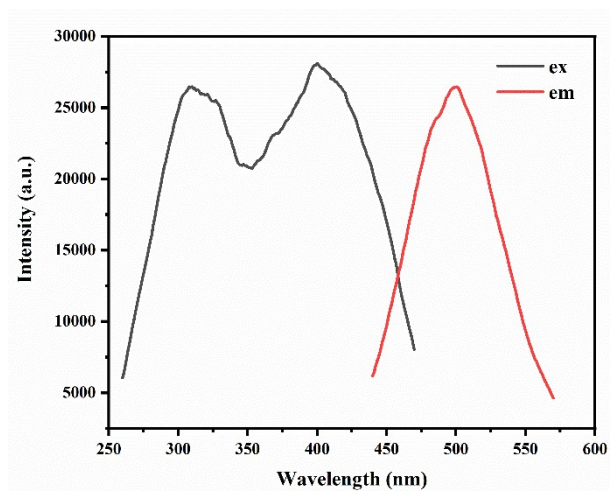

**Figure S9.** Excitation and emission of **1'**

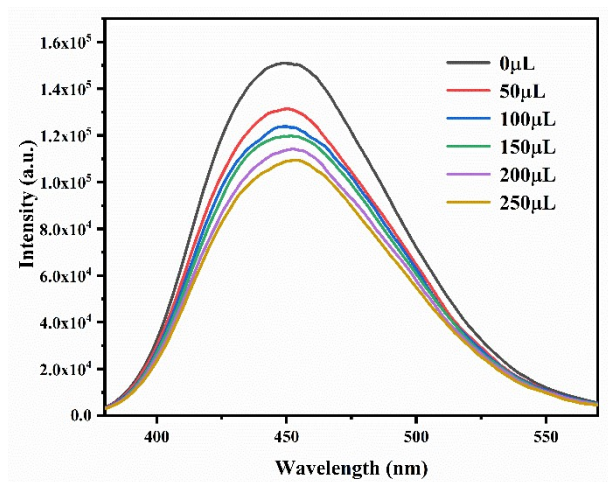

**Figure S10.** Emission spectra of **1** dispersed in H<sub>2</sub>O with the addition of 1,3-DNB solution (1 mM) ( $\lambda_{\text{ex}} = 350$  nm).

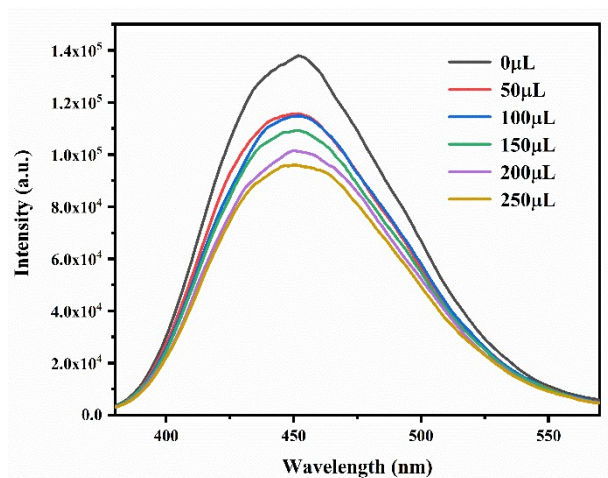

**Figure S11.** Emission spectra of **1** dispersed in H<sub>2</sub>O with the addition of 2,4-DNT

solution (1 mM) ( $\lambda_{\text{ex}} = 350 \text{ nm}$ ).

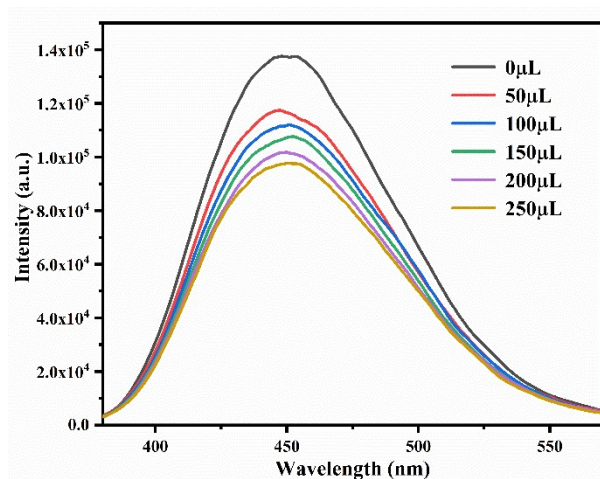

**Figure S12.** Emission spectra of **1** dispersed in H<sub>2</sub>O with the addition of 2,6-DNT solution (1 mM) ( $\lambda_{\text{ex}} = 350 \text{ nm}$ ).

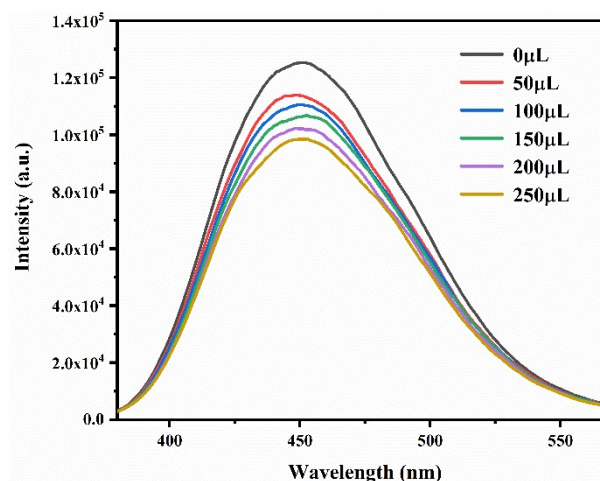

**Figure S13.** Emission spectra of **1** dispersed in H<sub>2</sub>O with the addition of NB solution (1 mM) ( $\lambda_{\text{ex}} = 350 \text{ nm}$ ).

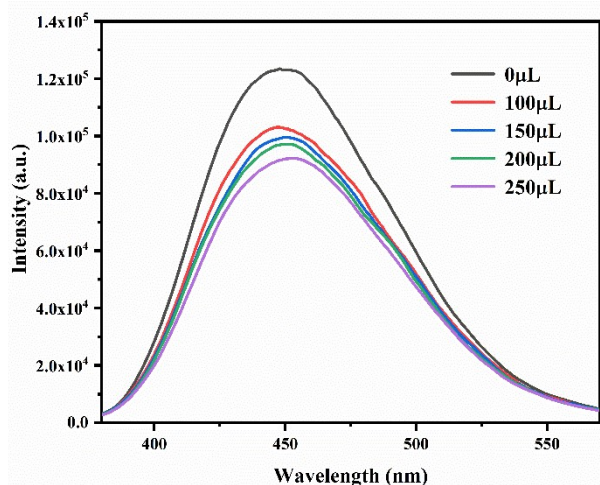

**Figure S14.** Emission spectra of **1** dispersed in H<sub>2</sub>O with the addition of NM solution (1 mM) ( $\lambda_{\text{ex}} = 350 \text{ nm}$ ).



solution (1 mM) ( $\lambda_{\text{ex}} = 350 \text{ nm}$ ).

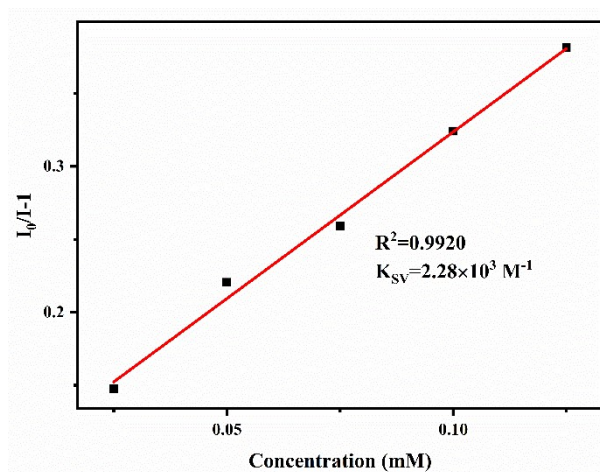

**Figure S15.** Stern-Volmer plot for 1,3-DNB of **1** in H<sub>2</sub>O suspension at the low concentration.

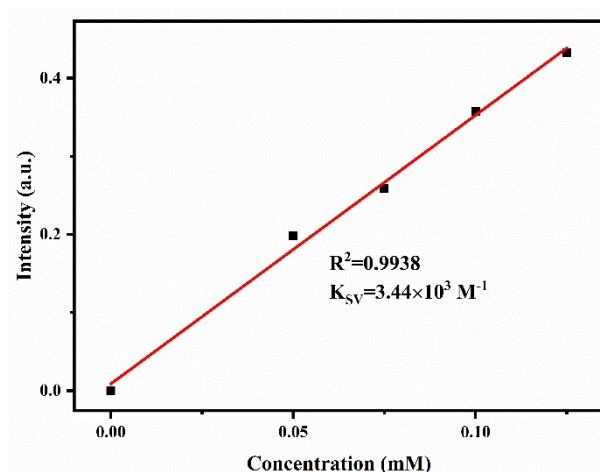

**Figure S16.** Stern-Volmer plot for 2,4-DNT of **1** in H<sub>2</sub>O suspension at the low concentration.

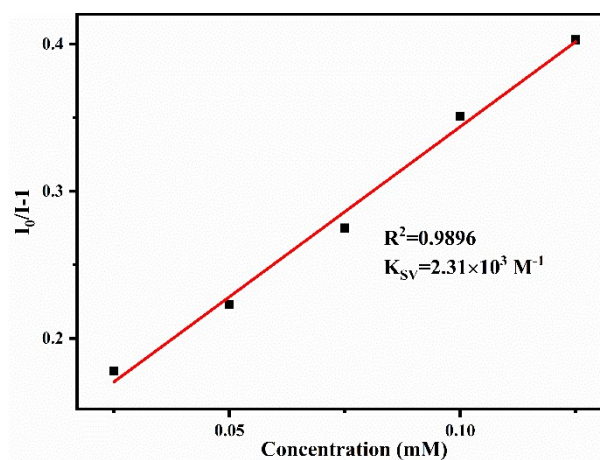

**Figure S17.** Stern-Volmer plot for 2,6-DNT of **1** in H<sub>2</sub>O suspension at the low

concentration.

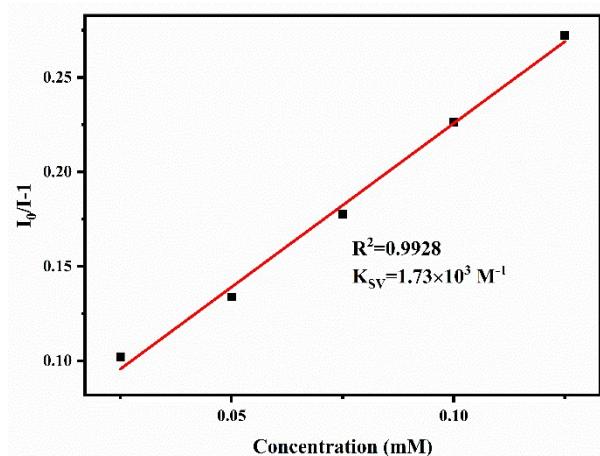

**Figure S18.** Stern-Volmer plot for NB of 1 in H<sub>2</sub>O suspension at the low concentration.

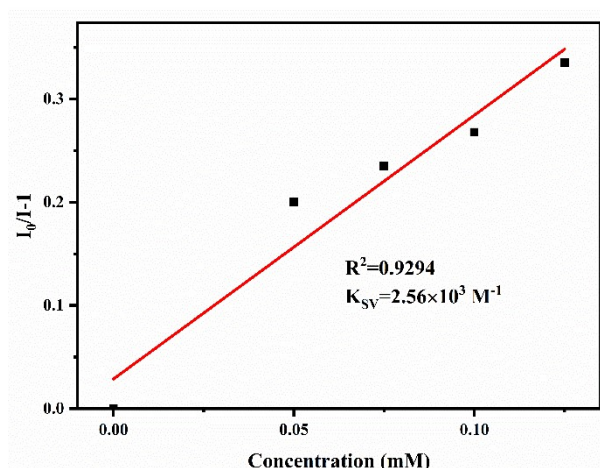

**Figure S19.** Stern-Volmer plot for NM of 1 in H<sub>2</sub>O suspension at the low concentration.

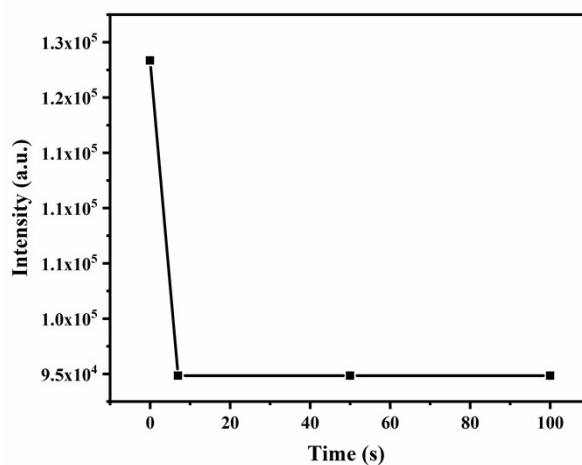

**Figure S20.** Response time on the Luminescence intensities of 1 after adding 50  $\mu\text{L}$  H<sub>2</sub>O solution of TNP (1 mM).



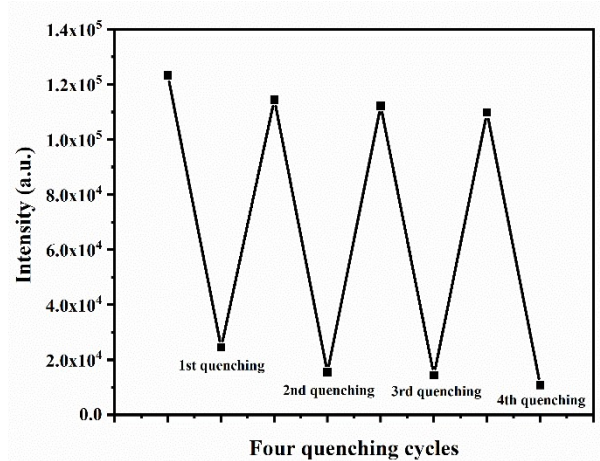

**Figure S21.** Reproducibility of response capability of **1** for sensing TNP in H<sub>2</sub>O.

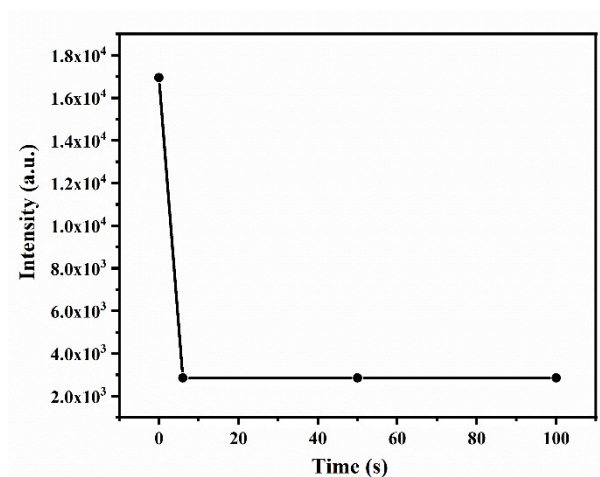

**Figure S22.** Response time on the Luminescence intensities of **1'** after adding 50 μL H<sub>2</sub>O solution of MnO<sub>4</sub><sup>-</sup> (2 mM).

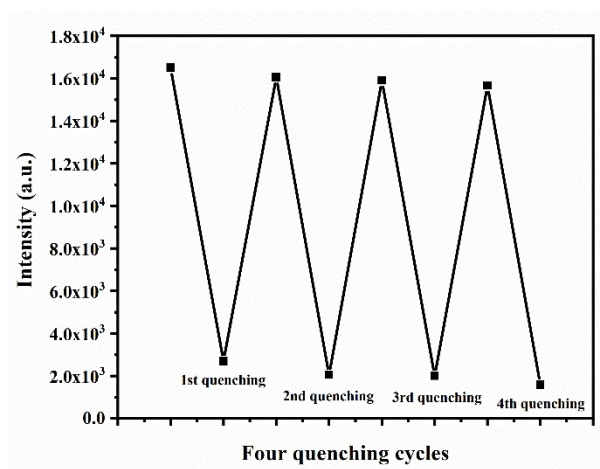

**Figure S23.** Reproducibility of response capability of **1'** for sensing MnO<sub>4</sub><sup>-</sup> in H<sub>2</sub>O.

**Table S1** Selected bond lengths for **1**.

| Bond          | Length (Å) | Bond         | Length (Å) |
|---------------|------------|--------------|------------|
| Cd(1)-O(4)    | 2.257(4)   | Cd(1)-O(2)   | 2.310(3)   |
| Cd(1)-O(11)#1 | 2.319(4)   | Cd(1)-N(1)   | 2.320(4)   |
| Cd(1)-O(12)#1 | 2.514(3)   | Cd(1)-N(4)#2 | 2.361(4)   |
| N(2)-Cd(2)#3  | 2.305(4)   | Cd(2)-O(3)   | 2.278(4)   |
| Cd(2)-O(7)#5  | 2.332(3)   | Cd(2)-N(2)#4 | 2.305(4)   |
| Cd(2)-N(3)#5  | 2.362(5)   | Cd(2)-O(8)#5 | 2.457(4)   |

**Table S2** Selected bond angles for **1**.

| Bond                 | Angles (°) | Bond                  | Angles (°) |
|----------------------|------------|-----------------------|------------|
| O(4)-Cd(1)-O(2)      | 126.82(13) | O(4)-Cd(1)-O(11)#1    | 93.83(13)  |
| O(2)-Cd(1)-O(11)#1   | 139.30(12) | O(4)-Cd(1)-N(1)       | 107.39(15) |
| O(2)-Cd(1)-N(1)      | 84.29(13)  | O(4)-Cd(1)-N(4)#2     | 89.57(15)  |
| O(11)#1-Cd(1)-N(1)   | 85.11(15)  | O(11)#1-Cd(1)-N(4)#2  | 96.87(14)  |
| O(2)-Cd(1)-N(4)#2    | 83.14(13)  | N(1)-Cd(1)-N(4)#2     | 162.79(15) |
| O(2)-Cd(1)-O(12)#1   | 86.40(12)  | O(4)-Cd(1)-O(12)#1    | 143.40(12) |
| N(1)-Cd(1)-O(12)#1   | 88.89(14)  | O(11)#1-Cd(1)-O(12)#1 | 54.21(12)  |
| N(4)#2-Cd(1)-O(12)#1 | 78.65(13)  | O(1)-Cd(2)-O(3)       | 105.62(13) |
| O(1)-Cd(2)-N(2)#4    | 109.46(16) | O(3)-Cd(2)-N(2)#4     | 83.17(15)  |
| O(1)-Cd(2)-O(7)#5    | 148.37(12) | O(3)-Cd(2)-O(7)#5     | 104.20(13) |
| N(2)#4-Cd(2)-O(7)#5  | 84.30(14)  | O(1)-Cd(2)-N(3)#5     | 90.47(15)  |
| O(3)-Cd(2)-N(3)#5    | 86.13(15)  | N(2)#4-Cd(2)-N(3)#5   | 159.29(15) |
| O(7)#5-Cd(2)-N(3)#5  | 81.20(14)  | O(1)-Cd(2)-O(8)#5     | 94.44(12)  |
| O(3)-Cd(2)-O(8)#5    | 158.01(13) | N(2)#4-Cd(2)-O(8)#5   | 98.78(14)  |
| O(7)#5-Cd(2)-O(8)#5  | 54.60(12)  | N(3)#5-Cd(2)-O(8)#5   | 84.77(14)  |

**Table S3** Hydrogen bonds for **1**.

| D-H···A               | d(D-H) (Å) | d(H···A) (Å) | d(D···A) (Å) | Angle(D-H···A) (°) |
|-----------------------|------------|--------------|--------------|--------------------|
| C(1)-H(1)···O(3)      | 0.93       | 2.52         | 3.191(7)     | 128.8              |
| O(5)-H(5A)···O(13)    | 0.74       | 1.99         | 2.691(6)     | 158.0              |
| C(5)-H(5)···O(12)#1   | 0.93       | 2.54         | 3.229(7)     | 131.3              |
| C(9)-H(9)···O(2)#3    | 0.93       | 2.35         | 3.203(6)     | 153.0              |
| O(9)-H(9A)···O(8)#7   | 0.79       | 1.90         | 2.677(5)     | 166.7              |
| C(10)-H(10)···O(7)#6  | 0.93       | 2.39         | 3.033(7)     | 126.5              |
| O(14)-H(6)···O(6)     | 0.905(10)  | 2.11(5)      | 2.878(8)     | 142(7)             |
| O(15)-H(13)···O(13)   | 0.901(10)  | 2.09(3)      | 2.862(7)     | 143(4)             |
| O(17)-H(17B)···N(2)#8 | 0.93       | 2.68         | 3.505(8)     | 147.7              |
| C(29)-H(29)···O(2)#6  | 0.93       | 2.51         | 3.092(6)     | 120.5              |
| C(34)-H(34)···O(10)#8 | 0.93       | 2.45         | 3.207(7)     | 138.7              |
| C(36)-H(36)···O(15)#7 | 0.93       | 2.47         | 3.254(8)     | 142.7              |
| C(54)-H(54)···O(1)#9  | 0.98       | 2.57         | 3.406(9)     | 143.5              |
| O(14)-H(3)···O(13)    | 0.900(10)  | 2.204(15)    | 2.708(8)     | 114.9(11)          |

Symmetry transformations used to generate equivalent atoms: #1  $x+1, y, z$ ; #2  $-x+2, y-1/2, -z+3/2$ ; #3  $-x+1, y+1/2, -z+3/2$ ; #4  $-x+1, y-1/2, -z+3/2$ ; #5  $x-1, y, z$ ; #6  $-x+2, y+1/2, -z+3/2$ ; #7  $-x+3/2, -y+1, z+1/2$ ; #8  $-x+3/2, -y+1, z-1/2$ ; #9  $x+1/2, -y+1/2, -z+1$ .
